# Supplementary material for: Protonation and water exchange kinetics in sandwich polyoxometalates
Source: Royal Society of Chemistry journal article supplement (doi:10.1039/c8dt02342e), 2018-01-01
Supplement: c8dt02342e2.pdf [file c8dt02342e2.pdf]

Supporting information:  
Protonation and water exchange kinetics in sandwich  
polyoxometalates.

C. André Ohlin<sup>1</sup>

<sup>1</sup>Department of Chemistry, Umeå University, Sweden

*Department of Chemistry, Umeå University, Sweden*

## Contents

### List of Tables

|    |                                                                                                                                                                                                                                                                                                                                                                                                   |   |
|----|---------------------------------------------------------------------------------------------------------------------------------------------------------------------------------------------------------------------------------------------------------------------------------------------------------------------------------------------------------------------------------------------------|---|
| S1 | Energies, bond distances and partial charges using different partition methods in $\text{H}_2[\text{Zn}_4(\text{H}_2\text{O})_2(\text{PW}_9\text{O}_{34})_2]^{8-}$ as a function of protonation site. Geometries optimised at pbe0/def2-svp with PCM. The $d(\text{M}-\text{OH}_2)$ in the non-protonated form is 2.192 Å. Partial charges were calculated for the unprotonated molecule. . . . . | 4 |
| S2 | Energies and bond distances in $\text{H}_2[\text{Zn}_4(\text{H}_2\text{O})_2(\text{PW}_9\text{O}_{34})_2]^{8-}$ (left) and $\text{H}_4[\text{Zn}_4(\text{H}_2\text{O})_2(\text{PW}_9\text{O}_{34})_2]^{6-}$ (right) as a function of protonation site. Geometries optimised at pbe0/def-svp with PCM. The $d(\text{M}-\text{OH}_2)$ in the non-protonated form is 2.192 Å. . . . .                | 4 |
| S3 | Energies and bond distances in $\text{H}_2[\text{Zn}_4(\text{H}_2\text{O})_2(\text{PW}_9\text{O}_{34})_2]^{8-}$ (left) and $\text{H}_4[\text{Zn}_4(\text{H}_2\text{O})_2(\text{PW}_9\text{O}_{34})_2]^{6-}$ (right) as a function of protonation site. Geometries optimised at pbe0/def2-tzvp with PCM. The $d(\text{M}-\text{OH}_2)$ in the non-protonated form is 2.236 Å. . . . .              | 5 |
| S4 | Bond parameters obtained from crystal structures, and rates of aquo-ligand exchange. Average bond distances were used where there were several different types of water ligands. . . . .                                                                                                                                                                                                          | 6 |

### List of Figures

|    |                                                                                                                                                                                                                                                                                                                                                                                                                                                                                                             |   |
|----|-------------------------------------------------------------------------------------------------------------------------------------------------------------------------------------------------------------------------------------------------------------------------------------------------------------------------------------------------------------------------------------------------------------------------------------------------------------------------------------------------------------|---|
| S1 | Structure of $[\text{Zn}_4(\text{H}_2\text{O})_2(\text{PW}_9\text{O}_{34})_2]^{10-}$ . $\mu_2$ -O sites are labelled A-J and L, the single $\mu_3$ -O site is labelled K, and the terminal $\eta$ -O sites are labelled N-Q. . . . .                                                                                                                                                                                                                                                                        | 3 |
| S2 | Top: Zn-OH <sub>2</sub> distance as a function of basis set. Bottom: $r$ vs protonation site, where $r$ is the Zn-OH <sub>2</sub> distance as a function of basis set divided by the Zn-OH <sub>2</sub> distance in the unprotonated complex at the same level of theory. Def2-svp results given as red squares and def2-tzvp data given as empty blue circles. The larger basis set gives longer absolute Zn-OH <sub>2</sub> distances, but also predicts a larger contraction due to protonation. . . . . | 7 |
| S3 | Comparison of partial charges from different methods at pbe0/def2-svp with relative energies of $\text{H}_2[\text{Zn}_4(\text{H}_2\text{O})_2(\text{PW}_9\text{O}_{34})_2]^{8-}$ protonated in different loci. All partial charges methods indicate that site K ( $\mu_3$ ) has the most negative partial charge. . . . .                                                                                                                                                                                   | 8 |

### Listings

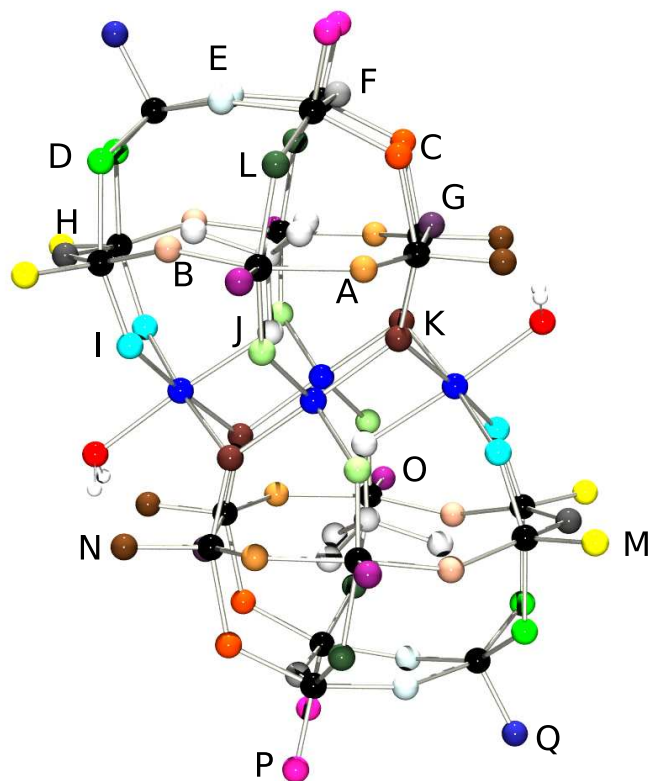

Figure S1: Structure of  $[\text{Zn}_4(\text{H}_2\text{O})_2(\text{PW}_9\text{O}_{34})_2]^{10-}$ .  $\mu_2$ -O sites are labelled A-J and L, the single  $\mu_3$ -O site is labelled K, and the terminal  $\eta$ -O sites are labelled N-Q.

Table S1: Energies, bond distances and partial charges using different partition methods in  $\text{H}_2[\text{Zn}_4(\text{H}_2\text{O})_2(\text{PW}_9\text{O}_{34})_2]^{8-}$  as a function of protonation site. Geometries optimised at pbe0/def2-svp with PCM. The  $d(\text{M}-\text{OH}_2)$  in the non-protonated form is 2.192 Å. Partial charges were calculated for the unprotonated molecule.

| Entry | Site          | $\epsilon$<br>(Hartree) | $\Delta\epsilon$<br>(kcal/mol) | $d(\text{M}-\text{OH}_2)$<br>(Å) | NBO <sup>a</sup><br>(a.u.) | MKUFF <sup>b</sup><br>(a.u.) | CHelpG <sup>c</sup><br>(a.u.) | HLYGAt <sup>d</sup><br>(a.u.) |
|-------|---------------|-------------------------|--------------------------------|----------------------------------|----------------------------|------------------------------|-------------------------------|-------------------------------|
| 1     | A ( $\mu_2$ ) | -14271.4963027          | 23.026                         | 2.171                            | -0.9212                    | -0.8996                      | -0.8946                       | -0.7597                       |
| 2     | B ( $\mu_2$ ) | -14271.5005239          | 20.378                         | 2.166                            | -0.9379                    | -0.9492                      | -0.9098                       | -0.7476                       |
| 3     | C ( $\mu_2$ ) | -14271.5026127          | 19.067                         | 2.167                            | -0.9279                    | -0.9000                      | -0.8750                       | -0.7821                       |
| 4     | D ( $\mu_2$ ) | -14271.5050184          | 17.557                         | 2.169                            | -0.9355                    | -0.9091                      | -0.8667                       | -0.7774                       |
| 5     | E ( $\mu_2$ ) | -14271.5088241          | 15.169                         | 2.168                            | -0.9404                    | -0.9243                      | -0.8716                       | -0.7510                       |
| 6     | F ( $\mu_2$ ) | -14271.5098391          | 14.532                         | 2.162                            | -0.9381                    | -0.9236                      | -0.8859                       | -0.7524                       |
| 7     | G ( $\mu_2$ ) | -14271.5061181          | 16.867                         | 2.164                            | -0.9325                    | -0.9560                      | -0.8883                       | -0.7946                       |
| 8     | H ( $\mu_2$ ) | -14271.5040763          | 18.148                         | 2.171                            | -0.9344                    | -0.9112                      | -0.9134                       | -0.7677                       |
| 9     | I ( $\mu_2$ ) | -14271.5322401          | 0.476                          | 2.156                            | -0.9581                    | -0.9626                      | -0.9230                       | -0.8581                       |
| 10    | J ( $\mu_2$ ) | -14271.5329979          | 0                              | 2.160                            | -0.9614                    | -0.9553                      | -0.9477                       | -0.8166                       |
| 11    | K ( $\mu_3$ ) | -14271.5104687          | 14.137                         | 2.167                            | <i>-1.0928</i>             | <i>-1.0320</i>               | <i>-1.0141</i>                | <i>-1.0917</i>                |
| 12    | L ( $\mu_2$ ) | -14271.4999138          | 20.760                         | 2.162                            | -0.9422                    | -0.9318                      | -0.8967                       | -0.8009                       |
| 13    | M ( $\eta$ )  | -14271.4608424          | 45.278                         | 2.165                            | -0.7634                    | -0.7086                      | -0.7474                       | -0.6412                       |
| 14    | N ( $\eta$ )  | -14271.4515435          | 51.113                         | 2.167                            | -0.7908                    | -0.7139                      | -0.7506                       | -0.6506                       |
| 15    | O ( $\eta$ )  | -14271.4604518          | 45.523                         | 2.170                            | -0.7639                    | -0.7067                      | -0.7492                       | -0.6384                       |
| 16    | P ( $\eta$ )  | -14271.4468487          | 54.059                         | 2.175                            | -0.7537                    | -0.6858                      | -0.7261                       | -0.6226                       |
| 17    | Q ( $\eta$ )  | -14271.4482246          | 53.196                         | 2.172                            | -0.7561                    | -0.6903                      | -0.7211                       | -0.6281                       |

<sup>a</sup> Natural atomic charges from Natural Bond Order analysis.[1] <sup>b</sup> The Mesler-Singh-Kollman scheme, using UFF radii.[2] <sup>c</sup> Breneman's modified CHelp scheme, using radii of 1.39 and 1.80 Å for Zn and W, respectively.[3] <sup>d</sup> The Hu, Lu, and Yang charge fitting method using G09 standard atom densities.[4] The most negatively charged oxygen for each method is given in italics.

Table S2: Energies and bond distances in  $\text{H}_2[\text{Zn}_4(\text{H}_2\text{O})_2(\text{PW}_9\text{O}_{34})_2]^{8-}$  (left) and  $\text{H}_4[\text{Zn}_4(\text{H}_2\text{O})_2(\text{PW}_9\text{O}_{34})_2]^{6-}$  (right) as a function of protonation site. Geometries optimised at pbe0/def-svp with PCM. The  $d(\text{M}-\text{OH}_2)$  in the non-protonated form is 2.192 Å.

| Entry | Site | $(\text{H}_2[\text{Zn}_4(\text{H}_2\text{O})_2(\text{PW}_9\text{O}_{34})_2]^{8-})$ |                                |                                  | $(\text{H}_4[\text{Zn}_4(\text{H}_2\text{O})_2(\text{PW}_9\text{O}_{34})_2]^{6-})$ |                                |                                  |
|-------|------|------------------------------------------------------------------------------------|--------------------------------|----------------------------------|------------------------------------------------------------------------------------|--------------------------------|----------------------------------|
|       |      | $\epsilon$<br>(Hartree)                                                            | $\Delta\epsilon$<br>(kcal/mol) | $d(\text{M}-\text{OH}_2)$<br>(Å) | $\epsilon$<br>(Hartree)                                                            | $\Delta\epsilon$<br>(kcal/mol) | $d(\text{M}-\text{OH}_2)$<br>(Å) |
| 1     | I    | -14271.5322401                                                                     | 0.476                          | 2.156                            | -14272.4578948                                                                     | -0.294                         | 2.119                            |
| 2     | J    | -14271.5329979                                                                     | 0                              | 2.160                            | -14272.4574264                                                                     | 0                              | 2.132                            |
| 3     | K    | -14271.5104687                                                                     | 14.137                         | 2.167                            | -14272.4146286                                                                     | 26.856                         | 2.130                            |

$\Delta\epsilon$  given relative to the lowest energy configuration for each protonation state.

Table S3: Energies and bond distances in  $H_2[Zn_4(H_2O)_2(PW_9O_{34})_2]^{8-}$  (left) and  $H_4[Zn_4(H_2O)_2(PW_9O_{34})_2]^{6-}$  (right) as a function of protonation site. Geometries optimised at pbe0/def2-tzvp with PCM. The  $d(M-OH_2)$  in the non-protonated form is 2.236 Å.

| Entry | Site          | $(H_2[Zn_4(H_2O)_2(PW_9O_{34})_2]^{8-})$ |                             |                 | $(H_4[Zn_4(H_2O)_2(PW_9O_{34})_2]^{6-})$ |                             |                 |
|-------|---------------|------------------------------------------|-----------------------------|-----------------|------------------------------------------|-----------------------------|-----------------|
|       |               | $\epsilon$ (Hartree)                     | $\Delta\epsilon$ (kcal/mol) | $d(M-OH_2)$ (Å) | $\epsilon$ (Hartree)                     | $\Delta\epsilon$ (kcal/mol) | $d(M-OH_2)$ (Å) |
| 1     | A ( $\mu_2$ ) | -14279.3302237                           | 22.038                      | 2.207           | —                                        | —                           | —               |
| 2     | B ( $\mu_2$ ) | -14279.3322006                           | 20.798                      | 2.199           | —                                        | —                           | —               |
| 3     | C ( $\mu_2$ ) | -14279.3341081                           | 19.601                      | 2.199           | —                                        | —                           | —               |
| 4     | D ( $\mu_2$ ) | -14279.3372344                           | 17.639                      | 2.202           | —                                        | —                           | —               |
| 5     | E ( $\mu_2$ ) | -14279.3383597                           | 16.933                      | 2.200           | —                                        | —                           | —               |
| 6     | F ( $\mu_2$ ) | -14279.3391176                           | 16.457                      | 2.193           | —                                        | —                           | —               |
| 7     | G ( $\mu_2$ ) | -14279.3357358                           | 18.579                      | 2.199           | —                                        | —                           | —               |
| 8     | H ( $\mu_2$ ) | -14279.3386754                           | 16.735                      | 2.205           | —                                        | —                           | —               |
| 9     | I ( $\mu_2$ ) | -14279.3653335                           | 0.007                       | 2.183           | -14280.2894352                           | 0.200                       | 2.138           |
| 10    | J ( $\mu_2$ ) | -14279.3653439                           | 0                           | 2.190           | -14280.2897538                           | 0                           | 2.152           |
| 11    | K ( $\mu_3$ ) | -14279.3439098                           | 13.450                      | 2.202           | -14280.2457475                           | 27.614                      | 2.153           |
| 12    | L ( $\mu_2$ ) | -14279.3321491                           | 20.830                      | 2.193           | —                                        | —                           | —               |
| 13    | M ( $\eta$ )  | -14279.3001521                           | 40.908                      | 2.197           | —                                        | —                           | —               |
| 14    | N ( $\eta$ )  | -14279.2907393                           | 46.815                      | 2.202           | —                                        | —                           | —               |
| 15    | O ( $\eta$ )  | -14279.2997023                           | 41.190                      | 2.202           | —                                        | —                           | —               |
| 16    | P ( $\eta$ )  | -14279.2845071                           | 50.725                      | 2.209           | —                                        | —                           | —               |
| 17    | Q ( $\eta$ )  | -14279.2861521                           | 49.693                      | 2.207           | —                                        | —                           | —               |

Table S4: Bond parameters obtained from crystal structures, and rates of aquo-ligand exchange. Average bond distances were used where there were several different types of water ligands.

| Entry          | Compound                                                                           | M-O bond distance (Å) <sup>a</sup> | k (s <sup>-1</sup> )  | References                   |
|----------------|------------------------------------------------------------------------------------|------------------------------------|-----------------------|------------------------------|
| 1              | [Ni(H <sub>2</sub> O) <sub>6</sub> ] <sup>2+</sup>                                 | 2.030                              | 4.4 · 10 <sup>4</sup> | Structure,[5] and rate.[6]   |
| 2              | [Ni(H <sub>2</sub> O) <sub>6</sub> ] <sup>2+</sup>                                 | 2.030                              | 3.2 · 10 <sup>4</sup> | Structure,[5] and rate.[7]   |
| 3              | [Ni(H <sub>2</sub> O) <sub>2</sub> (NCS) <sub>4</sub> ] <sup>2-</sup>              | 2.071                              | 1.1 · 10 <sup>6</sup> | Structure,[8] and rate.[9]   |
| 4              | [Ni(H <sub>2</sub> O) <sub>3</sub> (NH <sub>3</sub> ) <sub>3</sub> ] <sup>2+</sup> | 2.085                              | 2.5 · 10 <sup>5</sup> | Structure,[10] and rate.[9]  |
| 5 <sup>b</sup> | [Ni(H <sub>2</sub> O) <sub>4</sub> (en)] <sup>2+</sup>                             | 2.088                              | 4.4 · 10 <sup>5</sup> | Structure,[11] and rate.[6]  |
| 6              | [Ni(H <sub>2</sub> O) <sub>2</sub> (bipyridyl) <sub>2</sub> ] <sup>2+</sup>        | 2.090                              | 6.6 · 10 <sup>4</sup> | Structure,[12] and rate.[9]  |
| 7              | [Ni(H <sub>2</sub> O) <sub>5</sub> (NH <sub>3</sub> )] <sup>2+</sup>               | 2.104                              | 1.6 · 10 <sup>5</sup> | Structure,[10] and rate.[13] |

<sup>a</sup> Metal-to-oxygen distance. <sup>b</sup> en = ethylenediamine.

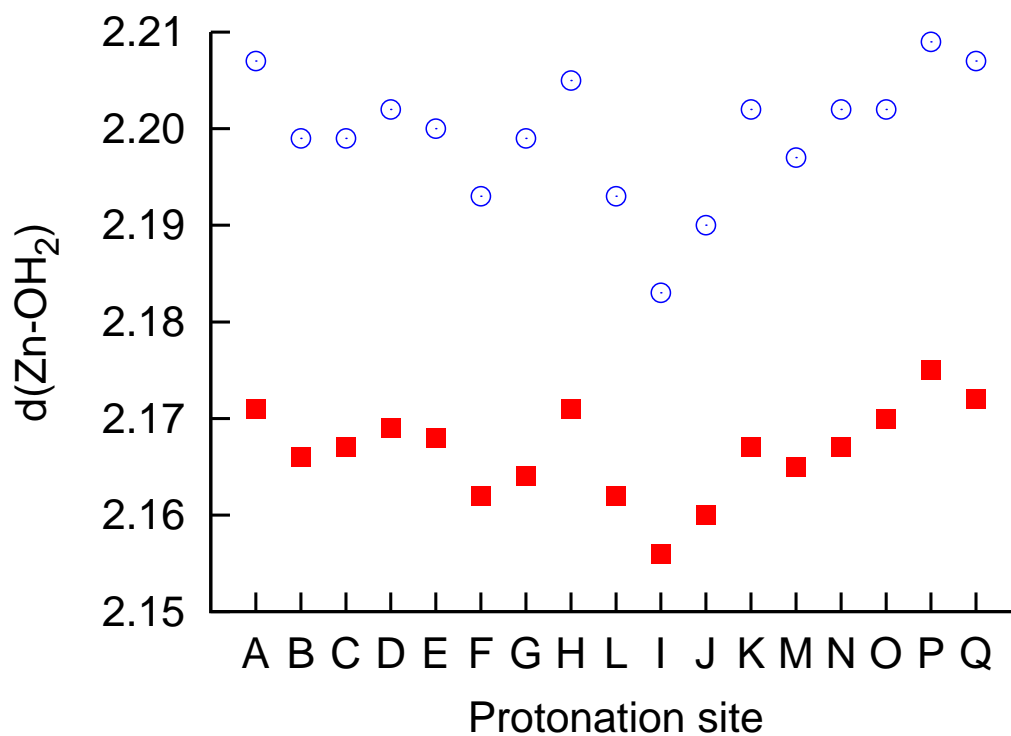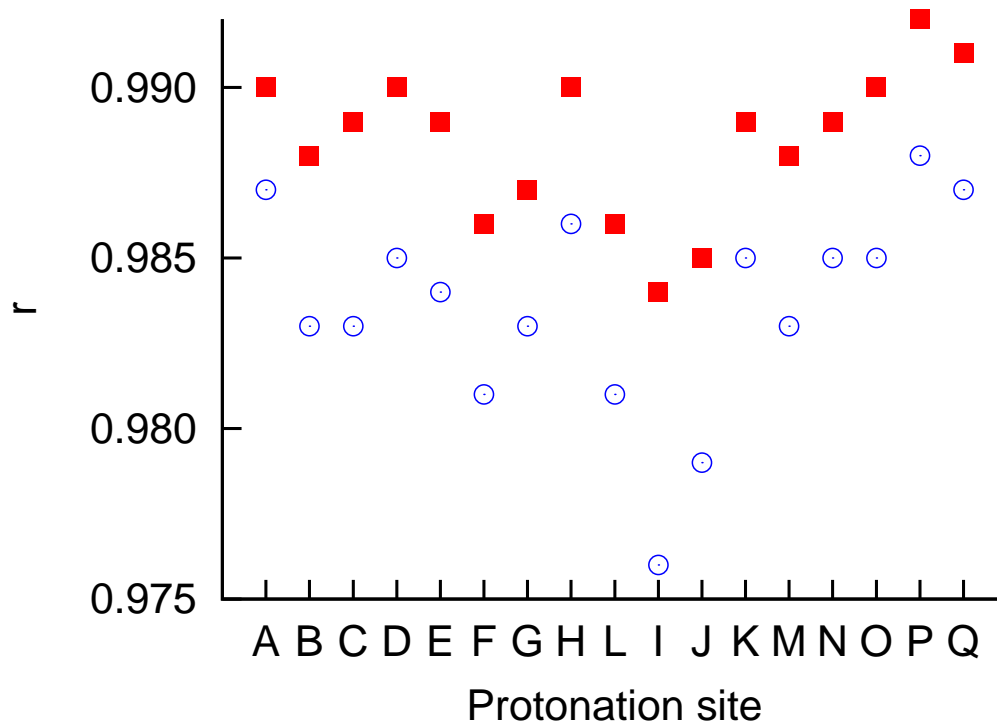

Figure S2: Top: Zn-OH<sub>2</sub> distance as a function of basis set. Bottom:  $r$  vs protonation site, where  $r$  is the Zn-OH<sub>2</sub> distance as a function of basis set divided by the Zn-OH<sub>2</sub> distance in the unprotonated complex at the same level of theory. Def2-svp results given as red squares and def2-tzvp data given as empty blue circles. The larger basis set gives longer absolute Zn-OH<sub>2</sub> distances, but also predicts a larger contraction due to protonation.

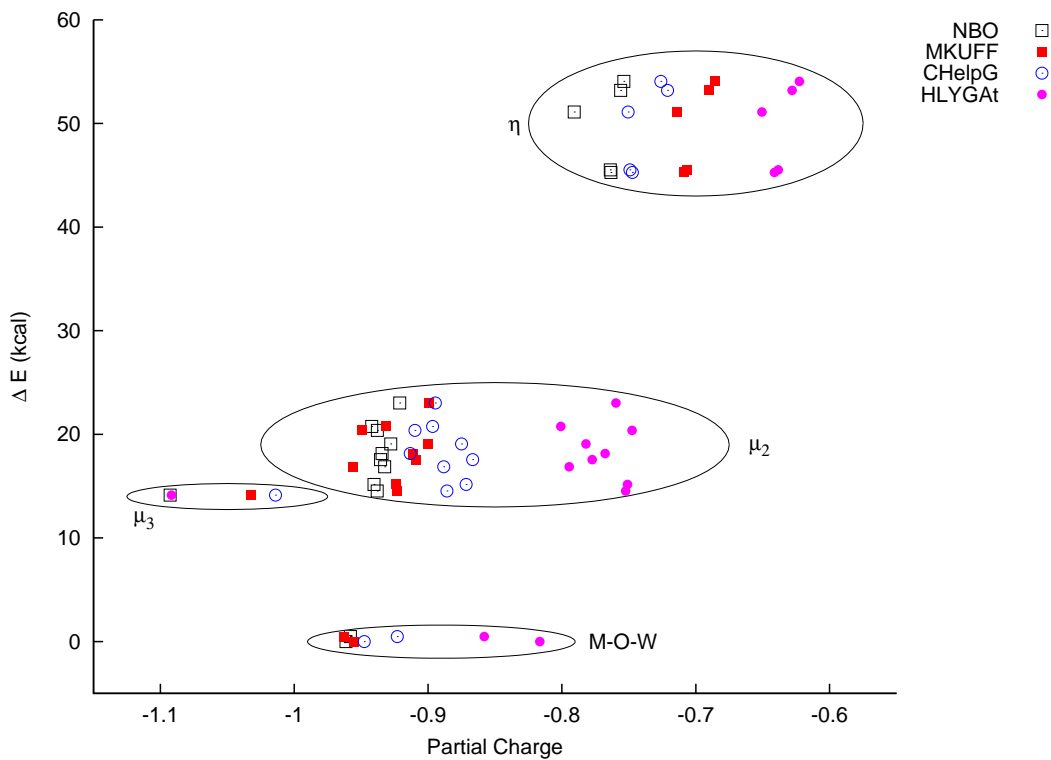

Figure S3: Comparison of partial charges from different methods at pbe0/def2-svp with relative energies of  $\text{H}_2[\text{Zn}_4(\text{H}_2\text{O})_2(\text{PW}_9\text{O}_{34})_2]^{8-}$  protonated in different loci. All partial charges methods indicate that site K ( $\mu_3$ ) has the most negative partial charge.



## References

- [1] E. D. Glendening, J. K. Badenhoop, A. E. Reed, J. E. Carpenter, J. A. Bohmann, C. M. Morales, C. R. Landis, F. Weinhold, *NBO 6.0*, <http://nbo6.chem.wisc.edu/>.
- [2] B. H. Besler, K. M. Merz, P. A. Kollman, *J. Comp. Chem.* **1990**, *11*, 431–439.
- [3] C. M. Breneman, K. B. Wiberg, *J. Comp. Chem.* **1990**, *11*, 361–373.
- [4] H. Hu, Z. Lu, W. Yang, *J. Chem. Theory Comp.* **2007**, *3*, 1004–1013, PMID: 26627419.
- [5] J. E. Morris, P. J. Squattrito, K. Kirschbaum, A. A. Pinkerton, *J. Chem. Cryst.* **2003**, *33*, 307–321.
- [6] A. G. Desai, H. W. Dodgen, J. P. Hunt, *J. Am. Chem. Soc.* **1969**, *91*, 5001–5004.
- [7] Y. Ducommun, K. E. Newman, A. E. Merbach, *Inorg. Chem.* **1980**, *19*, 3696–3703.
- [8] S. Sain, R. Saha, G. Pilet, D. Bandyopadhyay, *J. Mol. Struct.* **2010**, *984*, 350 – 353.
- [9] J. Hunt, *Coord. Chem. Rev.* **1971**, *7*, 1 – 10.
- [10] A. F. Benedetto, P. J. Squattrito, F. Adani, E. Montoneri, *Inorg. Chim. Acta* **1997**, *260*, 207 – 216.
- [11] G. J. McDougall, R. D. Hancock, *Dalton Trans.* **1980**, 654–658.
- [12] Y. Rodríguez-Martín, J. González-Platas, C. Ruiz-Pérez, *Acta Cryst. C* **1999**, *55*, 1087–1090.
- [13] S. Marks, H. W. Dodgen, J. P. Hunt, *Inorg. Chem.* **1968**, *7*, 836–837.
